# Supplementary material for: Doublesex target genes in the red flour beetle, Tribolium castaneum
Source: PubMed Central journal article supplement — Sci Rep. 2012 Dec 10;2:948. doi: 10.1038/srep00948 (PMC3517981; doi:10.1038/srep00948), 2012-12-10
Supplement: srep00948-s1.pdf [file srep00948-s1.pdf]

## Doublesex target genes in the red flour beetle, *Tribolium castaneum*

**Authors:** Jayendra Nath Shukla and Subba Reddy Palli

**Affiliations:** Department of Entomology, College of Agriculture,  
University of Kentucky, Lexington,  
KY 40546, United States of America

FIGURE 1S ClustalW alignment of TcDsx amino acid sequence coded by *Tcdsx* splice forms showing OD1/DM (grey shaded region) and OD2 (Yellow and blue shaded regions) domains. All the putative TcDsx proteins differ from each other at their C-terminus. The common region of OD2 (a) domain has been shown in yellow shaded region whereas female-specific regions (of OD2a) have been shown in orange. TcDsxM contains an additional OD2 (OD2b) domain (blue shaded region).

FIGURE 2S Schematic representation and sequence of female-specific exon (exon 3- in red color) of *Tcdsx* and its adjoining introns (black color) showing the presence of 3 putative Tra/Tra2 binding site (yellow line/shade), multiple Tra2-ISS binding site (grey line/shade) and a purine rich stretch (green line/ shade). Black lines within exon 3 in the schematic diagram represent the region of alternative splicing resulting in the production of three female specific isoforms.

FIGURE 3S Graphs showing the knockdown efficiencies of individual *Tcdsx* transcripts in all the three *Tcdsx* knockdown experiments; dsRNA injections targeting common region of *Tcdsx* (*Tcdsxf1*+*Tcdsxf2*+*Tcdsxf3*= C), *Tcdsxf1* and *Tcdsxf2* (*f1*+*f2*) and *Tcdsxf2* alone. Significant reduction ( $P < .05$ ) in the mRNA levels of target genes was observed in all the experiments.

Fig. 1S

**DM/OD1**

TcDsxF1 **MSSDSQDFDSKMDVNASSTSASPRTPPNCARCRNHRLKIALKGHKRYCKYRTCKCEKRL** 60  
TcDsxF3 **MSSDSQDFDSKMDVNASSTSASPRTPPNCARCRNHRLKIALKGHKRYCKYRTCKCEKRL** 60  
TcDsxF2 **MSSDSQDFDSKMDVNASSTSASPRTPPNCARCRNHRLKIALKGHKRYCKYRTCKCEKRL** 60  
Tcdsxm **MSSDSQDFDSKMDVNASSTSASPRTPPNCARCRNHRLKIALKGHKRYCKYRTCKCEKRL** 60  
\*\*\*\*\*

TcDsxF1 **TTERQVMMAMQTALRRAQAQDEAMLRSGSAVDPAIMQVPLKSPSPIHAIERSLDCDSSAS** 120  
TcDsxF3 **TTERQVMMAMQTALRRAQAQDEAMLRSGSAVDPAIMQVPLKSPSPIHAIERSLDCDSSAS** 120  
TcDsxF2 **TTERQVMMAMQTALRRAQAQDEAMLRSGSAVDPAIMQVPLKSPSPIHAIERSLDCDSSAS** 120  
Tcdsxm **TTERQVMMAMQTALRRAQAQDEAMLRSGSAVDPAIMQVPLKSPSPIHAIERSLDCDSSAS** 120  
\*\*\*\*\*

**OD2a**

TcDsxF1 **SQCSNPPPAIRKMTVPVAVPSSTSVNIGTIAQSTDILLEDCQKLLERFKYPWEMMPLMYAI** 180  
TcDsxF3 **SQCSNPPPAIRKMTVPVAVPSSTSVNIGTIAQSTDILLEDCQKLLERFKYPWEMMPLMYAI** 180  
TcDsxF2 **SQCSNPPPAIRKMTVPVAVPSSTSVNIGTIAQSTDILLEDCQKLLERFKYPWEMMPLMYAI** 180  
TcdsxM **SQCSNPPPAIRKMTVPVAVPSSTSVNIGTIAQSTDILLEDCQKLLERFKYPWEMMPLMYAI** 180  
\*\*\*\*\*

TcDsxF1 **LKDARADLEEASRRIDEGKRVVNEYSLHNLNMYDGVELRNST-----HNKNQDRRSF** 233  
TcDsxF3 **LKDARADLEEASRRIDE-----DNKNQDRRSF** 207  
TcDsxF2 **LKDARADLEEASRRIDEGKRVVNEYSLHNLNMYDGVELRNSTRQYG-----** 227  
TcdsxM **LKDARADLEEASRRIDEGRDTEILLDFCQRLKDKFQLSWKMISLVDVILKYAKDQDEAWR** 240  
\*\*\*\*\*

**OD2b**

TcDsxF1 **SSNPSFKSVNLQFKCNVLI-----** 252  
TcDsxF3 **SSNPSFKSVNLQFKCNVLI-----** 226  
TcDsxF2 -----  
TcdsxM **QIDEAFLEIRALAAVEAARYTYHHIPYSGLYPNAATAIYPPVYLPMSMYHPATLLGSVP** 300

TcDsxF1 -----  
TcDsxF3 -----  
TcDsxF2 -----  
TcdsxM **TSTSPSHSPPIVPRAIRPSSRA** 322

Fig.2S

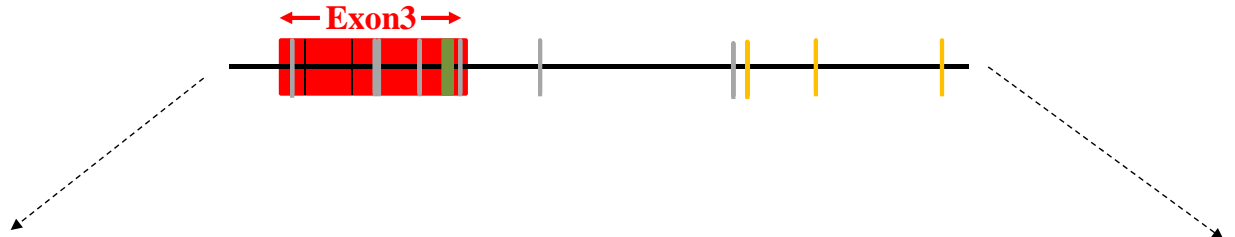

```
GTTAGTGTGACGATTGAAAAATTTAAATCTTAGCAATAATTTTAGTTTTATGATAAATTATGTACGAACTTTGTTAACCATATGCAAGTGTGGTTCATTGTTGGGT  
CACTTTATTTTGTAAATCATAATCAGTTGCAATTTTAATTTAATACACTTAATTTAGGAAAGCGTGTGTGAATGAGTACTCBAAGACTGACACAACCTCAACATGTA  
CGACGGAGTGGAGCTTCGAAATTCACGCGTCAGTATGGATGATTAATAAATTAACCATCACCCAAAATTTGTAGTTTCGATTAACCTCCTTCTGCTTCTGTTCAA  
TTCAGTAGATTTTGGGTGTTTTCAAAAATTTGTTGCCAGTCTGAAACAGTAATGCATGTCCCTTTTTTCTTTACCATTATAGATAACAAGAACCAAGACCGACGA  
AGTTTCAGCAGCAATCCATCCTCAAGTCCGTCACCTCGAGTTTAAATGCAACGCTTAATATAGACTTCGTCGCACCGCATCAGCTCAAGCGCTTATTTTATGTT  
TGTACTGATAGTTAAACCAATATTTAATGCATTAAGTATTTATACGTTGGACTCAAGCAACCTCAGAGGACCGAAGCTTCGTTATTTTGTGGCAGTATTTTTTAT  
CGTATTAAGTAAATTTAGCTTTAGTAAACATTTCTCAACATTTCAAGTTGTAAGTATATTTTGTATGTGAATTTATGACAACCTGGGAACGTTTACCCAAAAT  
GTTTTTAAAGACTAAGGCTGTGTCAAGAGCATTCTAAATCTTATAAGTAAGTCTGACGCTGCTCCGTAAGGTCGAAAAATTTCAAATGTTCTCGTAAACTT  
TCATCCGACTTCCACAATACTGTGCTGAATATTATTGTGTAGCCAACATGAGAAAGCATCCTCTGTGCAAGTGTAGTATTAACAAGTGAATTTGCCCCACAATTT  
TTAATTAACACGTAAGAAAGTAAATCTGTCCCTATTGCGTGGGTTTTCAAAATTCAGTCGTTTGTAGAATAAAATTTATTGTTTTGGCAAGGTTTCACATAAGTGAATT  
AGACGTAATAACTCTTGTAAACATTTGCGTTAAAAAGTTGCACGTTGCTGTTGGCAATTTCTTACCTAATCCAAAGTCACATGTTTACATAGCTTGAATGAAAACTAA  
TAAATTAATAATAAATCCACATATCACAAGGAAATATTTTATGAGTGCCTTCTATTATTATTAGTAATATAATAACAATACGATGATGAAATTTATTACTTC  
ATAAATTAACAATTAAGCGACTGCTGGCGATGTTTTAATCATTCTTGGTGTTTATTTTATTAGTATGAAATTAACGTAATGAAATGATGACCATTTGAAACAT  
GACTGCAGTATTTTTTATTACATCTTTGTAAGTAGCTAAGTATGTTGGCAGTTGTTTATCTGTATTTTGTGACATTCATAGAATCTTACTATGGATCGTAAGACCTG  
AAATGTGTATTAAGTCATTTCCCTTTTGTGATTAACCTGGTTGCGATAAAATGGTACCAGTAACCGCTATTAATGCAAATTAGTGTCTTTCTACATTGCAATTT  
GCATAAATCGTTTAAATTAAGCCCTGCCCGTTTTGGATCGAAGTTAGAAAAATTCGTAGTATAAAGCTTTTGGAAACTACTAATTTTAAACAAAGTTAGGACAA  
ATACCATTTATTTAAGCGTATTAGGATTAGTTATCTAACGATAAACCTGGCAATGACTTCTATGCAATTTCTAAAAAATAAGTGTCTGGACAGATAAGTCAGTT  
TATTATATTATCAAACTTATCTTGTATAGCAACAAAGTAAGCAGACCTTGTACTTTAAATACAATGTATACAGTGCTAGATATGCTACTATCTTGGTAAAAATAGAA  
GTTCAAATGCGGTAGGTGGGTACCTATCTCTGTTTCAAGTTTTAATAATCTGTAGTAATTTTATTGAAACAAGAGAAATTTATGATACAAGAAATTTCTGTGA  
TTAGATATCGTCTCACGTAATAATTTTTTTAATAAATGAACTGAAAAAATCTGTTGCAATGCGTTTGTATAATTAAGTAATTTGATAGATTTTTAAACAGTA  
CCTACATGAACTAAATATTTCTCATAGAGAAATTTTTAAGGAAGAAGATTTCAAAAATTTTGTGATGAAAGTACGCGTAACAGGTAGCTTATATTTTTTGGAG  
GTTCTATTTTCAAAGTAAATTTTTCTAGTCTGTAGCTTAAATAAATAAATAAAAAAGTAAATATGTTAAAAAATAATGAAAGATTTGTGCTTTTACGCAATA  
GATCATAGTTTCAAATAATATGTCAACGAAAAAGCGTAATAAGTTTTTCTAATAATATAATGAGAAGCCGGTCTCTTACACTTTTCTAATGTTTGTAAATGCAA  
CATTACGGTTTTTCTGTGAGTAAAGTAAATGATGTTTTTATTTTTTAAATCTTATTAATAAATAAAAAAGATATAGTCTATCAAAAATAAGAAAGAAATGAAA  
ATTTGATAAAGGTTGTTGTCCAAGTTCTAATCTAATTAATTAGAAAATTTTAGTCGTTGAGTCGTTAGATTTCTTTATCCAACCTTCTGCAGCGAAATCCCACC  
TTCCCTAAAAATCTCAGCCTTAATCGGTGTTTTATTTTTGTGTTTTGTTGGCAG
```

Fig. 3S

**A**

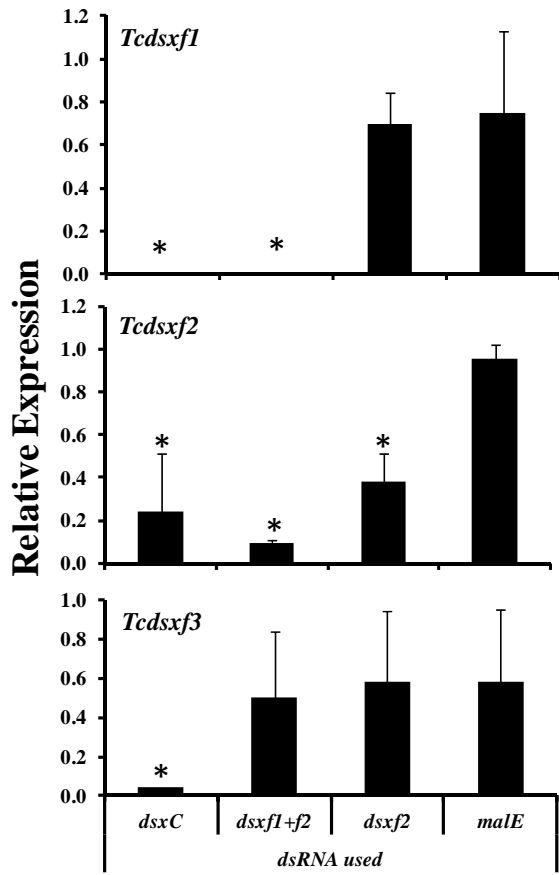

**B**

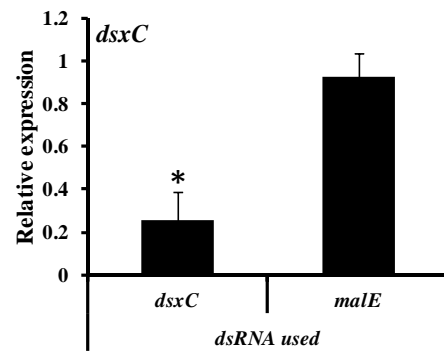

**TABLE 1S: List of sex-specific *Tcdsx* transcripts and protein isoforms.**

| <b><i>Tcdsx</i>Splice variant</b> | <b>Length (bp)</b> | <b>exons included</b> | <b>Predicted protein</b> | <b>protein length (aa)</b> |
|-----------------------------------|--------------------|-----------------------|--------------------------|----------------------------|
| <i>Tcdsxm</i>                     | 1788               | 1, 2, 4, 5, 6         | TcDsxM                   | 332                        |
| <i>Tcdsxf1</i>                    | 2264               | 1, 2, 3, 4, 5, 6      | TcDsxF1                  | 252                        |
| <i>Tcdsxf2</i>                    | 2428               | 1, 2, 3, 4, 5, 6      | TcDsxF2                  | 227                        |
| <i>Tcdsxf3</i>                    | 2186               | 1, 2, 3, 4, 5, 6      | TcDsxF3                  | 226                        |

**TABLE 2S: List of primers and their sequences used in the study.**

| <b>Primer name</b> | <b>Primer sequence</b>     |
|--------------------|----------------------------|
| <b>dsRNA</b>       |                            |
| dsxCommon          | GTCCTCCGACAGCCAAGACT       |
|                    | CTGAGGAGTCGCAGTCCAGA       |
| dsxf1+f2           | AAAGCGTGTGTGAATGAGTA       |
|                    | TTGAATTTCGAAGCTCCACTC      |
| dsxf2              | CCATCACCCAAAATTTGTAGTTTCG  |
|                    | AAAGGGGACATGCATTACTGTTTC   |
| RT-PCR             |                            |
| dsx(F1-R1)         | ACAGTCCGCGACAAGGTTGC       |
|                    | CATGCCGTAAATGACCTGCTAA     |
| Dsx(F2-R2)         | AGCACTTCCGTCAACATTGG       |
|                    | TTTGGCAGAAGTCTAACAGAATTTCA |
| dsxqCommon         | TTCAAGTATCCGTGGGAAATGA     |
|                    | CGGGAAGCCTCTTCCAAGT        |
| qRTf1R             | GTCTTGGTTCTTGTATGCGTTG     |
| qRTf2R             | GAAACTACAAATTTTGGGTGATGG   |
| qRTf3R             | CGGTCTTGGTTCTTGTATCCTCA    |
| G13602             | TTGCAAATGCTGGGTGGTGAAGAC   |
|                    | AGCGTGTGCGTTGATAACTTGCTG   |
| G10839             | AACGCACACGATTTTCGACCAAGTG  |
|                    | ACGGCAGCATTAACTTGGTTGCTC   |
| G14653             | AACTCAACGTCGCCTCCCTTGTAT   |
|                    | GTCCGCGTGGTTGAACTTCACTTT   |
| G07775             | ATACTAGCGTCTCCAATTGCGGGT   |
|                    | TAGGCCCTAGCAAAGGCCCAATTA   |
| G05384             | AAACCGTCTCCTCGATGATGTGCT   |
|                    | ACTTCATGCCATTAGGCTCTCGT    |
| G7186              | CCTTACGGCCAACACCACACAAAT   |
|                    | TGGCTCCCTCCATATGACCAACAT   |
| G03183             | AAATCGCGCTCCGATCTCAGTCTT   |
|                    | ATACGGCGTGTGTACGGAGTCTT    |
| G08596             | AGGTGACGTATTTGCTATCGCCCA   |
|                    | AAGTGTCGCAATCCTCCTCTGGTT   |
| G04042             | ACTCGCGATGTATCAGTTCTGCGT   |
|                    | TTGGTCCCTTGTACACGTGGAGTT   |
| G15076             | TGGCCATCAGGTCCATTCACTACA   |
|                    | ATATCCGCAGCCTTGAAAGCCTA    |
| G07776             | ACCATTGCTTGGACCACTCTTTGC   |

|        |                          |
|--------|--------------------------|
|        | CCAAGTTTGTGTACCAAAGGCGCA |
| G06658 | CGTCCATTCAATCGCCCACCATTT |
|        | ACGTCATTGTCGCTCTCCAATCA  |
